# Supplementary material
Source: PubMed Central journal article supplement (PMC6706860)
Supplement: NIHMS1044394-supplement-Supplmentary_Information.pdf [file NIHMS1044394-supplement-Supplmentary_Information.pdf]

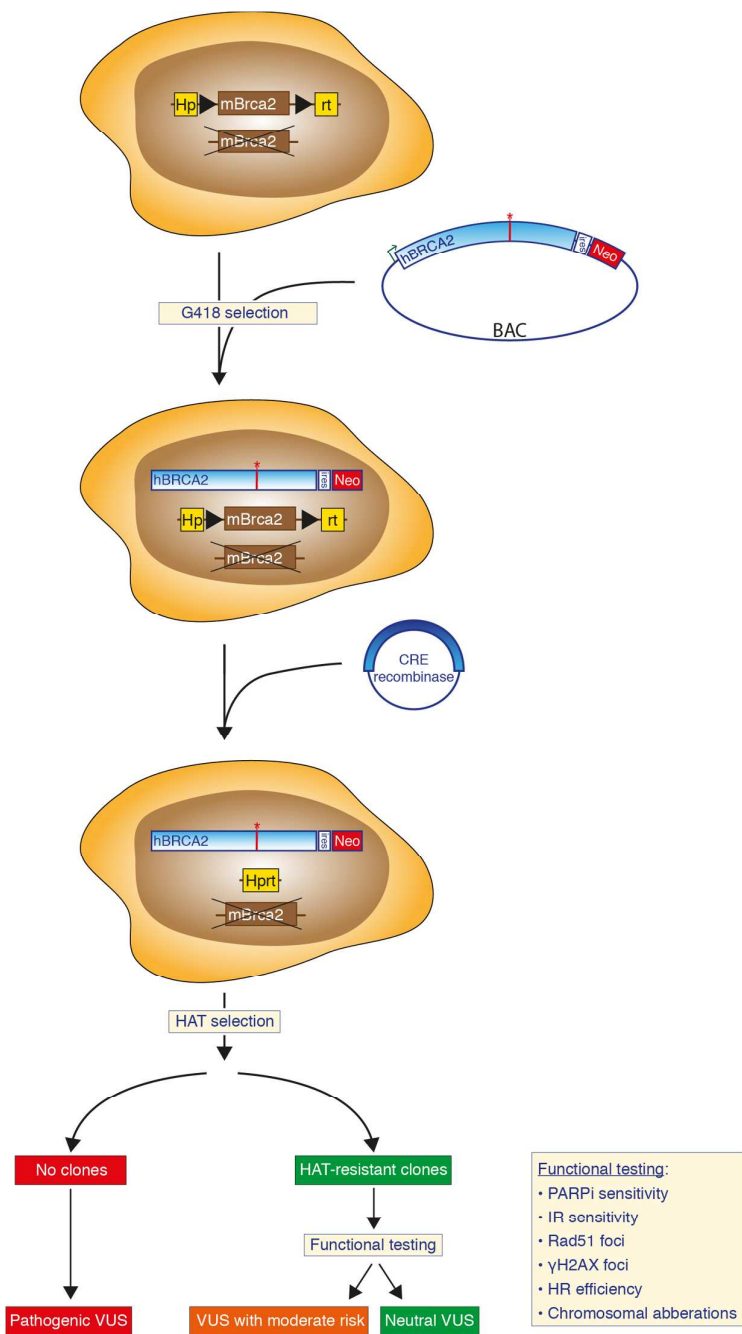

**Supplementary Figure 1: Outline for functional testing of VUS by complementation of *BRCA2*-deficient mES cells.** *mBrca2*<sup>-loxP</sup> conditional knock out mES cells were transfected with a *hBRCA2* BAC containing a specific VUS. The IRES Neomycin selection cassette greatly increases the frequency of mES clones that contain the complete *hBRCA2* gene. The conditional *mBrca2* gene is removed upon transient expression of the Cre recombinase, resulting in functional restoration of an *HPRT* minigene and subsequent HAT resistance. Transfection of *hBRCA2* variants that can complement the lethal phenotype of *mBrca2* deficient mES cells will result in large numbers of HAT resistant clones. VUS that do not give complementation are considered pathogenic. HAT resistant mES cell clones are subjected to various functional tests to determine whether a VUS does not affect *hBRCA2* function and can be considered neutral or whether *hBRCA2* functionality is partially impaired.

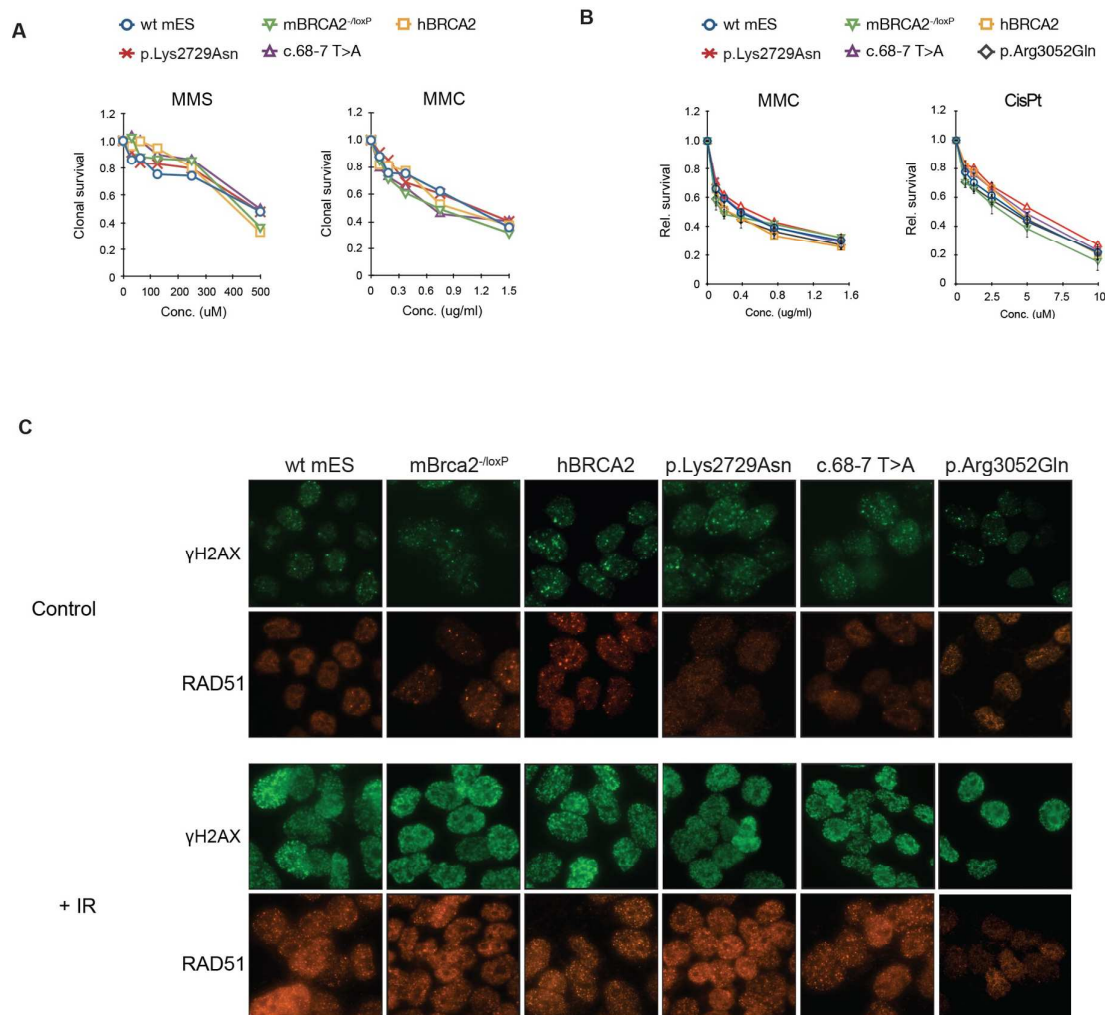

**Supplementary Figure 2: Functional analysis of hBRCA2 variants.** (A) Sensitivity of mES cells expressing the *hBRCA2* variants p.Lys2729Asn and c.68 7T>A or wild type *hBRCA2* for MMS and MMC. Wild type mES cells and *mBrca2*<sup>-loxP</sup> conditional knockout mES cells were used as control. Sensitivity was determined in a clonal survival assay. (B) Sensitivity of mES cells expressing the *hBRCA2* variants p.Lys2729Asn, c.68 7T>A, p.Arg3052Gln or wild type *hBRCA2* for MMC and Cisplatin. Wild type mES cells and *mBrca2*<sup>-loxP</sup> conditional knockout mES cells were used as control. Sensitivity was determined in a cell count assay. (C) RAD51 foci formation in response to 10Gy ionizing radiation in mES cells expressing the non pathogenic *hBRCA2* variants p.Lys2729Asn and c.68 7T>A, the intermediate variant p.Arg3052Gln and wild type *hBRCA2*. Phosphorylation of histone H2AX was used to confirm the induction of double strand breaks ionizing radiation IR.

**Supporting Table 1: primer sequences for hBRCA2 variant generation and sequence conformation.**

| Primername                     | Purpose                                  | Primer sequence 5'-3'                                                       |
|--------------------------------|------------------------------------------|-----------------------------------------------------------------------------|
| <i>Integration of IRES-Neo</i> |                                          |                                                                             |
| hBrca2-Cterm-IRES-F            | IRES-Neo with hBRCA2 homology arms       | AATGTGAGAAAAATAAGCAGGACACAATTACAACATAAAAAATACTAATGATCGAGTTCGAGTAAATTAAG     |
| hBrca2-Cterm-Neo-R             | IRES-Neo with hBRCA2 homology arms       | TAAACTGGAAAGGTTAAGCGTCAATAATTTATTGTGCGCTTTGCAAAATGCTCAGAAGAAGCTCGTCAAGAAAG  |
| hBrca2-CGFP-F2                 | Check proper BAC integration             | GTCACTGATCCACTAGGAC                                                         |
| hBrca2-CGFP-R2                 | Check proper BAC integration             | TGCCGATACACAAACGCTG                                                         |
| <i>Removal of loxP sites</i>   |                                          |                                                                             |
| LoxP1-rpsl-amp-F               | rpsL-Amp with hBRCA2 homology arms       | CTTATCGATGATAAGCTGTCAAACATGAGAATTGATCCGGAACCCCTTAATCGGTTTTATGGACAGCAAGCGAAC |
| LoxP1-rpsl-amp-R               | rpsL-Amp with hBRCA2 homology arms       | CCGATGCAAGTGTGTCGCTGTCGACGGTGAACCTATAGTCGAGGGACCTATTACCAATGCTTAATCAGTGGAG   |
| LoxP1-del-F                    | dsDNA fragment for Red/ET recombineering | CTTATCGATGATAAGCTGTCAAACATGAGAATTGATCCGGAACCCCTTAATCGGTTTTATGGACAGCAAGCGAAC |
| LoxP1-del-R                    | dsDNA fragment for Red/ET recombineering | CCGATGCAAGTGTGTCGCTGTCGACGGTGAACCTATAGTCGAGGGACCTAATTAAGGGTT                |
| LoxP1-check-F                  | Check proper BAC integration             | CGCATAGAAATTGGATCAACGC                                                      |
| LoxP1-Check-R                  | Check proper BAC integration             | CAAGGGCAAGTATTGACATGTC                                                      |
| LoxP2-rpsl-amp-F               | rpsL-Amp with hBRCA2 homology arms       | CGTAAAGCGGGCACATTTTATTCTCTCTTTCGCGACCCGACATAGATACGGTTTTTATGGACAGCAAGCGAAC   |
| LoxP2-rpsl-amp-R               | rpsL-Amp with hBRCA2 homology arms       | CGGGGCTGACTATTGGCGCGCCGGATCGATCCTTAATTAAGTCTACTAGTTACCAATGCTTAATCAGTGGAG    |
| LoxP2-del-F                    | dsDNA fragment for Red/ET recombineering | CGTAAAGCGGGCACATTTTATTCTCTCTTTCGCGACCCGACATAGATAGTACTAGACT                  |
| LoxP2-del-R                    | dsDNA fragment for Red/ET recombineering | CGGGGCTGACTATTGGCGCGCCGGATCGATCCTTAATTAAGTCTACTAGTATCTATGTC                 |
| LoxP2-check-F                  | Check proper BAC integration             | CCTTAAACGCCTGGTTGCTAC                                                       |
| LoxP2-Check-R                  | Check proper BAC integration             | CCTATAGTGAGTCTGATTAGC                                                       |
| <i>hBRCA2 variants</i>         |                                          |                                                                             |
| Brca2-7878-rpsl-F              | rpsL-Amp with hBRCA2 homology arms       | GTGGATCCAAAGCTTATTCTAGAAATTTGGGTTTTATACTACTATAGATGCGGTTTTATGGACAGCAAGCGAAC  |
| Brca2-7879-amp-R               | rpsL-Amp with hBRCA2 homology arms       | AGCAAATTCCTTAGGAAAGGCACATCCATAGTCCGACCTTCCATATGATTACCAATGCTTAATCAGTGGAGGC   |
| Brca2-7878-G>C-F               | dsDNA fragment for Red/ET recombineering | GTGGATCCAAAGCTTATTCTAGAAATTTGGGTTTTATACTACTATAGATGATCATATGGAA               |
| Brca2-7878-G>C-R               | dsDNA fragment for Red/ET recombineering | AGCAAATTCCTTAGGAAAGGCACATCCATAGTCCGACCTTCCATATGATGATCATATGGAA               |
| Brca2-7879-A>T-F               | dsDNA fragment for Red/ET recombineering | GTGGATCCAAAGCTTATTCTAGAAATTTGGGTTTTATACTACTATAGATGATGGTTTCAATGGAA           |
| Brca2-7879-A>T-R               | dsDNA fragment for Red/ET recombineering | AGCAAATTCCTTAGGAAAGGCACATCCATAGTCCGACCTTCCATATGAACCATCTATAGT                |
| Brca2-7878-7879-F2             | Check proper BAC integration             | GCCACCATGCTCAGCAATGA                                                        |
| Brca2-7878-7879-R2             | Check proper BAC integration             | CACCTGACCACTGGCTGTGTC                                                       |
| Brca2-8187-rpsl-F              | rpsL-Amp with hBRCA2 homology arms       | ACCFAAAAGTGGCCATTATTGAACCTACAGATGGGTGGTATGCTGTTAACGGTTTTATGGACAGCAAGCGAAC   |
| Brca2-8187-amp-R               | rpsL-Amp with hBRCA2 homology arms       | GTCAAGTCTGCCATTCTTAAAGACAGCTAAGAGGGGAGGATCTAAGTGGGCTTACCAATGCTTAATCAGTGGAGC |
| Brca2-8187-G>T-F               | dsDNA fragment for Red/ET recombineering | ACCFAAAAGTGGCCATTATTGAACCTACAGATGGGTGGTATGCTGTTAACGGTTTTATGGACAGCAAGCGAAC   |
| Brca2-8187-G>T-R               | dsDNA fragment for Red/ET recombineering | GTCAAGTCTGCCATTCTTAAAGACAGCTAAGAGGGGAGGATCTAAGTGGGCAATTAACAGCAT             |
| Brca2-8187-F2                  | Check proper BAC integration             | GATACGAAATATGATAAGCAG                                                       |
| Brca2-8187-R2                  | Check proper BAC integration             | GCTTCAAGAGGTGACAGGC                                                         |
| Brca2-9154-Rpsl-F              | rpsL-Amp with hBRCA2 homology arms       | TTTTTTTTCTGTAGTTTCAGATGAAATTTTATTTCAGATTTACCAGCCAGGTTTTATGGACAGCAAGCGAAC    |
| Brca2-9155-amp-R               | rpsL-Amp with hBRCA2 homology arms       | AAGATGGCTGAAAGTCTGGATCTAAAATTTGCTGAAGTGAAGGGGCTCCCAATGCTTAATCAGTGGAGGC      |
| Brca2-9154-C>T-F               | dsDNA fragment for Red/ET recombineering | TTTTTTTTCTGTAGTTTCAGATGAAATTTTATTTCAGATTTACCAGCCATGGGAGCCCTT                |
| Brca2-9154-C>T-R               | dsDNA fragment for Red/ET recombineering | AAGATGGCTGAAAGTCTGGATCTAAAATTTGCTGAAGTGAAGGGGCTCCCAATGCTGTTAA               |
| Brca2-9155-G>A-F               | dsDNA fragment for Red/ET recombineering | TTTTTTTTCTGTAGTTTCAGATGAAATTTTATTTCAGATTTACCAGCCACAGGAGCCCTT                |
| Brca2-9155-G>A-R               | dsDNA fragment for Red/ET recombineering | AAGATGGCTGAAAGTCTGGATCTAAAATTTGCTGAAGTGAAGGGGCTCTGTGGCTGGTAA                |
| Brca2-9154-9155-wt-F           | dsDNA fragment for Red/ET recombineering | TTTTTTTTCTGTAGTTTCAGATGAAATTTTATTTCAGATTTACCAGCCAGGAGCCCTT                  |
| Brca2-9154-9155-wt-R           | dsDNA fragment for Red/ET recombineering | AAGATGGCTGAAAGTCTGGATCTAAAATTTGCTGAAGTGAAGGGGCTCCCGTGGCTGGTAA               |
| Brca2-9154/9155-5-F2           | Check proper BAC integration             | GAGCTAACATACAGTATGAC                                                        |
| Brca2-9154/9155-3-R2           | Check proper BAC integration             | CACCAATAAACATCAATGGG                                                        |
| Brca2-ivs2-7-rpsl-F            | rpsL-Amp with hBRCA2 homology arms       | GGTCACAATTTGTCTGTCAGTGTAAACTAAGGTGGGATTTTTTTTCGGTTTTATGGACAGCAAGCGAAC       |
| Brca2-ivs2-7-amp-R             | rpsL-Amp with hBRCA2 homology arms       | TGAAGAAAGTCTTCAAACCAATTAAGACTTATTGGTCTCAATATTTTTTACCATGCTTAATCAGTGGAGC      |
| Brca2-ivs2-7-T>A-F             | dsDNA fragment for Red/ET recombineering | GGTCACAATTTGTCTGTCAGTGTAAACTAAGGTGGGATTTTTTTTAAAATGATGTT                    |
| Brca2-ivs2-7-T>A-R             | dsDNA fragment for Red/ET recombineering | TGAAGAAAGTCTTCAAACCAATTAAGACTTATTGGTCTCAATATTTTTTAAAATGATGTT                |
| Brca2-ivs2-7-F2                | Check proper BAC integration             | CTATAGATTGCAAGAGAAATGG                                                      |
| Brca2-ivs2-7-R2                | Check proper BAC integration             | CAGAGTCAAGCCCTTGCTCTT                                                       |
| Brca2-ivs15+2-rpsl-F           | rpsL-Amp with hBRCA2 homology arms       | GAAAGGAGCAGTAGGAGGCCAAGTTCCTCTGCGTGTCTATAACAGGCGGTTTTATGGACAGCAAGCGAAC      |
| Brca2-ivs15+2-amp-R            | rpsL-Amp with hBRCA2 homology arms       | ATAAAATTCACACTGTCTATAAAAGCCATCAGTATTGTAGACAAAACACATTTACCAATGCTTAATCAGTGGAGC |
| Brca2-ivs15+2-T>G-F            | dsDNA fragment for Red/ET recombineering | GAAAGGAGCAGTAGGAGGCCAAGTTCCTCTGCGTGTCTATAACAGGAGGATGTTTTGT                  |
| Brca2-ivs15+2-T>G-R            | dsDNA fragment for Red/ET recombineering | ATAAAATTCACACTGTCTATAAAAGCCATCAGTATTGTAGACAAAACACATTTACCAATGCTTAATCAGTGGAGC |
| Brca2-ivs15+2-F2               | Check proper BAC integration             | GATTACAGGGCTGAGCCACT                                                        |
| Brca2-ivs15+2-R2               | Check proper BAC integration             | TGCCACTGCAAGGCTAATAG                                                        |
| Brca2-ivs21+5-rpsl-F           | rpsL-Amp with hBRCA2 homology arms       | GCTTTATGAAGCAGTGAAGAATGCAGCAGCCAGCTACCTTACCTGAGGTGACGGTTTTATGGACAGCAAGCGAAC |
| Brca2-ivs21+5-amp-R            | rpsL-Amp with hBRCA2 homology arms       | GCTTCTCACCTGTAATAATCATCAAGCCCTATTATATGTCCTTACTCTTTACCAATGCTTAATCAGTGGAGC    |
| Brca2-ivs21+5-G>A-F            | dsDNA fragment for Red/ET recombineering | GCTTTATGAAGCAGTGAAGAATGCAGCAGCCAGCTACCTTACCTGAGGTGAAAGAGTAAAG               |
| Brca2-ivs21+5-G>A-R            | dsDNA fragment for Red/ET recombineering | GCTTCTCACCTGTAATAATCATCAAGCCCTATTATATGTCCTTACTCTTTACCTCAAG                  |
| Brca2-ivs21+5-F2               | Check proper BAC integration             | GCACCTCCAGATTGGGTGAC                                                        |
| Brca2-ivs21+5-R2               | Check proper BAC integration             | CATACCACACACTCGTCTG                                                         |
| <i>cDNA analysis</i>           |                                          |                                                                             |
| RBR2EX2F2M13                   | Brca2-ivs2-7: Exon2                      | TGTAAACGACGGCCAGTTTTTAAAGACAGCTGCAACAAGG                                    |
| RBR2EX10R-M13                  | Brca2-ivs2-7: Exon10                     | CAGGAACAGCTATGACCAATGTGGTCTTTGACGATTAATCT                                   |
| RBR2EX14F                      | Brca2-ivs15+2: Exon14                    | ACAACATAAGGAACGTCAAG                                                        |
| RBR2EX16R                      | Brca2-ivs15+2: Exon16                    | TATGCAATGTTTGAAGACG                                                         |
| RBRCA2EX19F                    | Brca2-ivs21+5: Exon19                    | ACTTGGATCTTTCTCTGAC                                                         |
| RBRCA2EX23R                    | Brca2-ivs21+5: Exon23                    | TAAATCTGATGATGGACGC                                                         |
| RBR2EX22F-M13                  | Expression level hBRCA2                  | TGTAAACGACGGCCAGTTGTTGAATGATAAGAAACAAGCTCA                                  |
| RBR2EX27R                      | Expression level hBRCA2                  | CTCTTCTCCCTTTTACAAGACTTT                                                    |
| Sus3                           | mouse Aprt gene                          | GTCTTCCCGACTTCCCAAT                                                         |
| Sus4                           | mouse Aprt gene                          | GCCAGGAGGTCATCCACAAT                                                        |

Supplementary Table 2. Description of BRCA2 variants and available data

| Exon | Nucleotide  | Amino acid   | IARC classification <sup>1</sup> | RNA splicing                                                                       | HDR assay | Cell Viability | Embryonic stem cell based assay    |          |                | Centrosome amplification    | Functional classification | References |
|------|-------------|--------------|----------------------------------|------------------------------------------------------------------------------------|-----------|----------------|------------------------------------|----------|----------------|-----------------------------|---------------------------|------------|
|      |             |              |                                  |                                                                                    |           |                | Sensitivity to DNA damaging agents | HR assay | RAD51 foci     |                             |                           |            |
| 2    | c.68-7T>A   | p.?          | Not available                    | Wildtype and Δ3 transcript from variant allele                                     | ND        | ND             | ND                                 | ND       | ND             | Unlikely to affect function | 12, 14                    |            |
| 15   | c.7617+2T>G | p.?          | Not available                    | Skip exon 15                                                                       | ND        | ND             | ND                                 | ND       | ND             | Impairs protein function    | 14                        |            |
| 17   | c.7878G>C   | p.Trp2626Cys | Class 5                          | ND                                                                                 | Deficient | Reduced        | Yes                                | Absent   | ND             | Impairs protein function    | 2; 3; 9                   |            |
| 17   | c.7879A>T   | p.Ile2627Phe | Class 5                          | ND                                                                                 | Deficient | ND             | ND                                 | ND       | Increase       | Impairs protein function    | 3; 5; 9                   |            |
| 18   | c.8165C>G   | p.Thr2722Arg | Class 5                          | Wildtype and Δ18 transcript from variant allele                                    | Deficient | No             | NA                                 | NA       | Increase       | Impairs protein function    | 3; 4; 5; 8; 9             |            |
| 18   | c.8167G>C   | p.Asp2723His | Class 5                          | ND                                                                                 | Deficient | No             | NA                                 | NA       | Increase       | Impairs protein function    | 5; 6; 8; 9; 16            |            |
| 18   | c.8168A>G   | p.Asp2723Gly | Class 5                          | Wildtype transcript and partial deletion of exon 18 transcript from variant allele | Deficient | ND             | ND                                 | ND       | ND             | Impairs protein function    | 3; 5; 9; 11; 13; 15       |            |
| 18   | c.8187G>T   | p.Lys2729Asn | Class 1                          | ND                                                                                 | Normal    | Yes            | No                                 | Normal   | Wildtype level | Does not affect function    | 2; 3; 5; 9                |            |
| 18   | c.8243G>A   | p.Gly2748Asp | Class 5                          | ND                                                                                 | Deficient | ND             | ND                                 | ND       | Increase       | Impairs protein function    | 3; 5; 9                   |            |
| 18   | c.8308G>A   | p.Ala2770Thr | Class 2                          | ND                                                                                 | ND        | ND             | ND                                 | ND       | ND             | Does not affect function    | 9                         |            |
| 21   | c.8764+5G>A | p.?          | Not available                    | Retention 46 nt from intron 21                                                     | ND        | ND             | ND                                 | ND       | ND             | Impairs protein function    | 13                        |            |
| 24   | c.9154C>T   | p.Arg3052Trp | Class 5                          | ND                                                                                 | Deficient | No             | NA                                 | NA       | Wildtype level | Impairs protein function    | 5; 7; 8; 10; 15           |            |
| 24   | c.9155G>A   | p.Arg3052Gln | Class 2                          | ND                                                                                 | ND        | Yes            | Intermediate                       | ND       | ND             | Probably affects function   | 3; 7; 8; 9; 10;           |            |

This table describes the results of previous functional studies.

Nucleotide numbering reflects HGVS nomenclature where cDNA numbering +1 corresponding to the A of the ATG translation initiation codon in the reference sequence (BRCA2 NM\_000059.3). The initiation codon is codon 1, nt. nucleotides.

<sup>1</sup>IARC classification (Lindor et al., 2012): Class 1 non-pathogenic; Class 2 likely non-pathogenic; Class 3 likely pathogenic; Class 4 pathogenic; Class 5 pathogenic

NA: not applicable since no clones were formed that could be tested

All variants are reported in public database (<http://chromium.liacs.nl/LOVD2/genecore/home.php>)

- Biswas K, Das R, Alter BP, Kuznetsov SG, Stauffer S, North SL, Burkett S, Brody LC, Meyer S, Byrd RA, Sharan SK. 2011. A comprehensive functional characterization of BRCA2 variants associated with Fanconi anemia using mouse ES cell-based assay. *Blood* 118(9):2430-42.
- Chenewix-Trench G, Healey S, Lakhtani S, Waring P, Cummings M, Brinkworth R, Deffenbaugh AM, Burbidge LA, Pruss D, Judkins T, Scholl T, Bekessy A, Marsh A, Lovelock P, Wong M, Tesoro A, Renard H, Southey M, Hopper JL, Yannoukakis K, Brown M, Easton D, Tavtigian SV, Goldgar D, Spurdie AB, KConFab Investigators. 2006. Genetic and histopathologic evaluation of BRCA1 and BRCA2 DNA sequence variants of unknown clinical significance. *Cancer Res* 66:2019-27
- Easton DF, Deffenbaugh AM, Pruss D, Frye C, Wenstrup RJ, Allen-Brady K, Tavtigian SV, Monteiro AN, Iversen ES, Couch FJ, Goldgar DE. 2007. A systematic genetic assessment of 1,433 sequence variants of unknown clinical significance in the BRCA1 and BRCA2 breast cancer-predisposition genes. *Am J Hum Genet* 81(5):873-83.
- Fackenthal JD, Cartegni L, Kraimer AR, Olopade OI. BRCA2 T2722R is a deleterious allele that causes exon skipping. 2002. *Am J Hum Genet* 71:625-31. Erratum in *Am J Hum Genet* 2003 73:1477
- Farrugia DJ, Aganwal MK, Pankratz VS, Deffenbaugh AM, Pruss D, Frye C, Wadum L, Johnson K, Mentlick J, Tavtigian SV, Goldgar DE, Couch FJ. 2008. Functional assays for classification of BRCA2 variants of uncertain significance. *Cancer Res* 68(9):3523-31
- Goldgar DE, Easton DF, Deffenbaugh AM, Monteiro AN, Tavtigian SV, Couch FJ. 2004. Integrated evaluation of DNA sequence variants of unknown clinical significance: application to BRCA1 and BRCA2. *Am J Hum Genet* 75(4):535-44.
- Gómez García EB, Oosterwijk JC, Timmermans M, van Asperen CJ, Hogervorst FB, Hoogerbrugge N, Oldenburg R, Verhoef S, Dommering CJ, Ausems MG, van Os TA, van der Hout AH, Ligtenberg M, van den Ouweland A, van der Luijt RB, Wijnen JT, Gille JJ, Lindsey PJ, Devilee P, Blok MJ, Vreeswijk MP. 2009. A method to assess the clinical significance of unclassified variants in the BRCA1 and BRCA2 genes based on cancer family history. *Breast Cancer Res* 11:R8
- Kuznetsov SG, Liu P, Sharan SK. 2008. Mouse embryonic stem cell-based functional assay to evaluate mutations in BRCA2. *Nature medicine* 14(8):875-81.
- Lindor NM, Guidugli L, Wang X, Vallee MP, Monteiro AN, Tavtigian S, Goldgar DE, Couch FJ. 2012. A review of a multifactorial probability-based model for classification of BRCA1 and BRCA2 variants of uncertain significance (VUS). *Hum Mutat* 33(1):8-21.
- Mohammadi L, Vreeswijk MP, Oldenburg R, van den Ouweland A, Oosterwijk JC, van der Hout AH, Hoogerbrugge N, Ligtenberg M, Ausems MG, van der Luijt RB, Dommering CJ, Gille JJ, Verhoef S, Hogervorst FB, van Os TA, Gómez García E, Blok MJ, Wijnen JT, Heimer O, Devilee P, van Asperen CJ, van Houwelingen HC. 2009. A simple method for co-segregation analysis to evaluate the pathogenicity of unclassified variants: BRCA1 and BRCA2 as an example. *B-C Cancer* 9:211
- Sanz DJ, Acedo A, Infante M, Durán M, Pérez-Cabomero L, Esteban-Cardeña E, Lastra E, Pagani F, Miner C, Velasco EA. 2010. A high proportion of DNA variants of BRCA1 and BRCA2 is associated with aberrant splicing in breast/ovarian cancer patients. *Clin Cancer Res* 16:1957-67
- Spurdie AB. Personal Communication.
- Théry JC, Krieger S, Galdrat P, Révillon F, Buisine MP, Killian A, Duponchel C, Roussellet A, Yaur D, Peyrat JP, Berthet P, Frébourg T, Martins A, Hardouin A, Tosi M. 2011. Contribution of bioinformatics predictions and functional splicing assays to the interpretation of unclassified variants of the BRCA genes. *Eur J Hum Genet* 19:1052-8
- Vreeswijk MP, Kraaijn JN, van der Klift Hink, Yink GR, Cornelisse CJ, Wijnen JT, Bakker E, van Asperen CJ, Devilee P. 2008. Intrinsic variants in BRCA1 and BRCA2 that affect RNA splicing can be reliably selected by splice-site prediction programs. *Hum Mutat* 30:107-14
- Walker LC, Whitley PJ, Couch FJ, Farrugia DJ, Healey S, Eccles DM, Lin F, Butler SA, Goff SA, Thompson BA, Lakhtani SR, Da Silva LM. 2010. Detection of splicing aberrations caused by BRCA1 and BRCA2 sequence variants encoding missense substitutions: implications for prediction of pathogenicity. *Hum Mutat* 31(6):E1484-505
- Wu K, Hinson SR, Ohnishi A, Farrugia D, Wendt P, Tavtigian SV, Deffenbaugh A, Goldgar D, Couch FJ. 2005. Functional evaluation and cancer risk assessment of BRCA2 unclassified variants. *Cancer Res* 65(2):417-26.
